# Supplementary material for: Rapid diagnosis of Capnocytophaga canimorsus septic shock in an immunocompetent individual using real-time Nanopore sequencing: a case report
Source: Springer Nature journal article supplement (doi:10.1186/s12879-019-4173-2), 2019-07-24
Supplement: MOESM4 [file 16986048]

A)

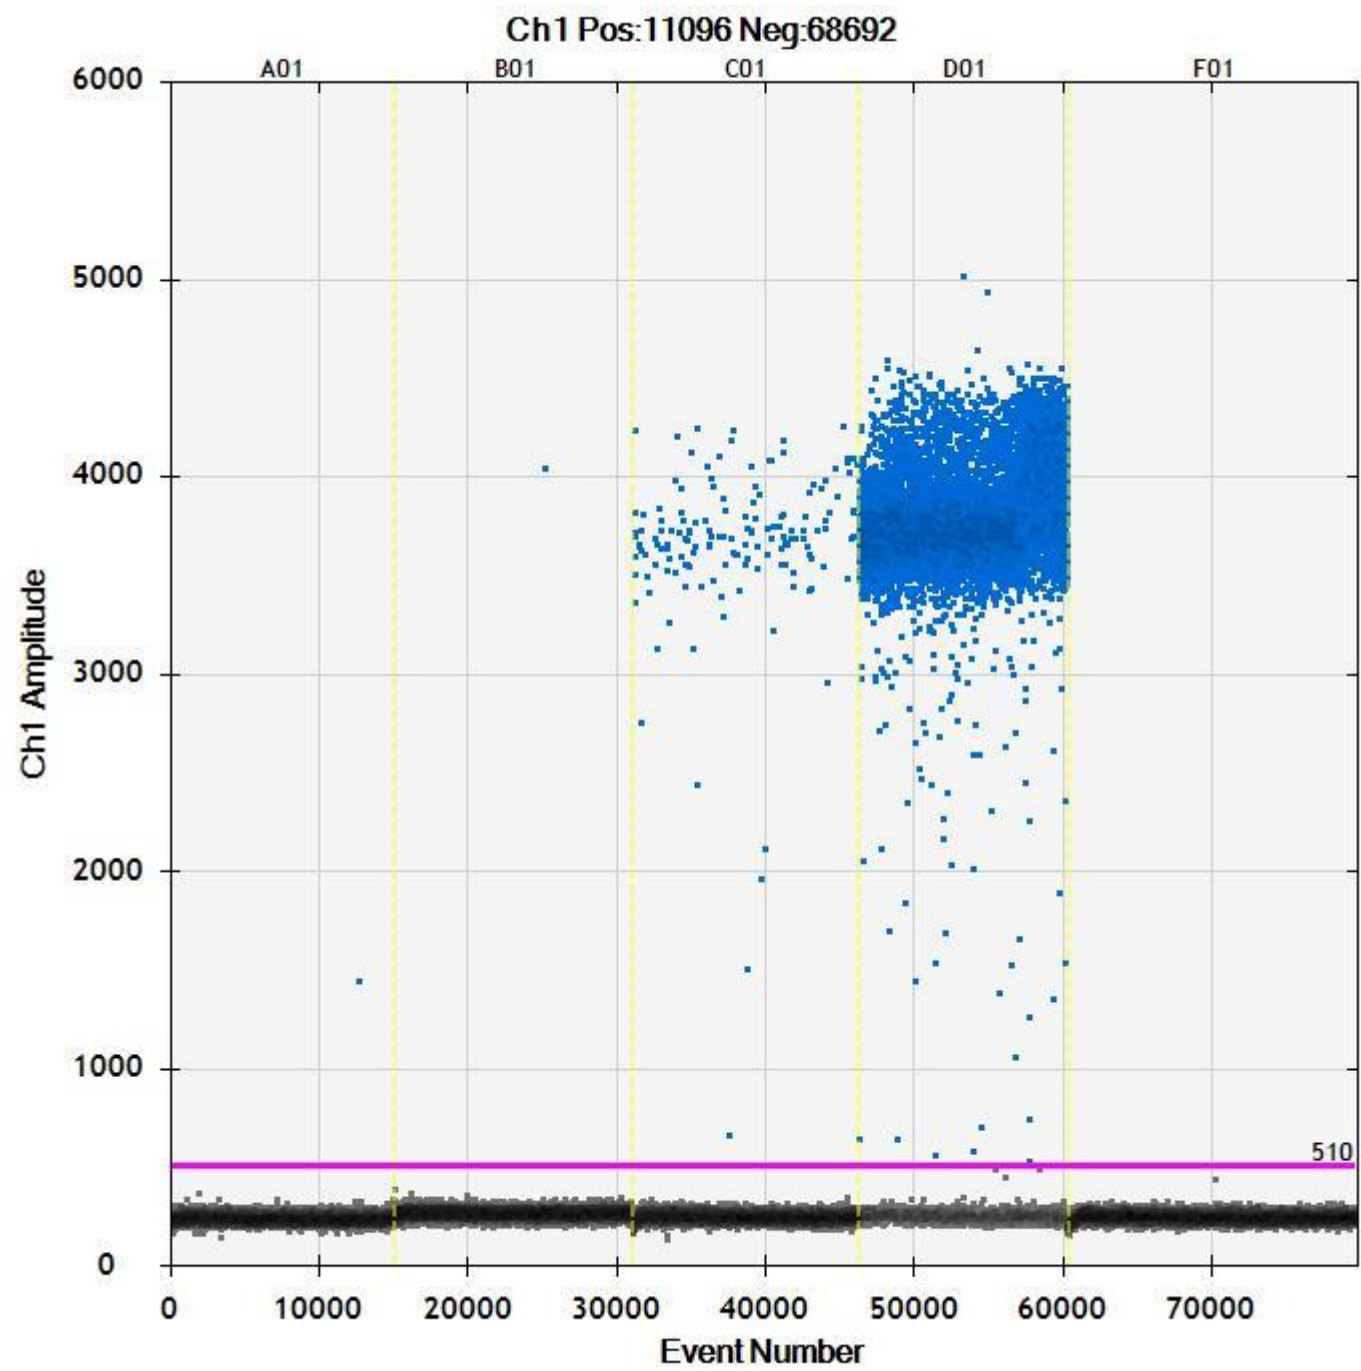

B)

| Well | Sample                            | copies/ $\mu$ l extract<br>(5 $\mu$ l/reaction) | copies/mL of<br>sample |
|------|-----------------------------------|-------------------------------------------------|------------------------|
| A01  | d5 Plasma                         | 0.32                                            | 240                    |
| B01  | d5 EDTA                           | 0.28                                            | 210                    |
| C01  | d0 Plasma                         | 47.2                                            | 35400                  |
| D01  | d0 EDTA                           | 7116                                            | 5337000                |
| E01  | <i>C. canimorsus</i> 1:20 culture | Saturated                                       | n/a                    |
| F01  | Human DNA                         | 0                                               | n/a                    |
| G01  | <i>C. canimorsus</i> synth -7     | 2308                                            | 1731000                |
| H01  | <i>C. canimorsus</i> synth -8     | 192.8                                           | 144600                 |
